# Supplementary material for: Membrane Fouling Controlled by Adjustment of Biological Treatment Parameters in Step-Aerating MBR
Source: MDPI journal article supplement (doi:10.3390/membranes11080553), 2021-07-22
Supplement: s1 [file s1]

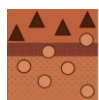

## Supplementary Material

**Table S1.** Specifications of the membrane module.

|                                       |                                    |
|---------------------------------------|------------------------------------|
| Membrane configuration                | A4 flat sheet (Type H 203, Kubota) |
| Base of membrane sheet                | Polyethylene terephthalate (PET)   |
| Filtration material of membrane sheet | Chlorinated polyethylene (CPE)     |
| Nominal pore size                     | 0.4 $\mu\text{m}$                  |
| Effective membrane area               | 0.11 $\text{m}^2$                  |
| Clean water initial permeate flow     | 7.2 L/h                            |
